# Sign-consistency based variable importance for machine learning in brain imaging

Vanessa Gómez-Verdejo<sup>a,d</sup>, Emilio Parrado-Hernández<sup>a</sup>, Jussi Tohka<sup>b,d</sup>, for the Alzheimer's Disease Neuroimaging Initiative<sup>c</sup>

<sup>a</sup>*Department of Signal Processing and Communications,  
Universidad Carlos III de Madrid, Leganés, Spain*

<sup>b</sup>*University of Eastern Finland, A.I. Virtanen Institute for Molecular Sciences, Kuopio, Finland*

<sup>c</sup>*Data used in preparation of this article were obtained from the Alzheimers Disease Neuroimaging Initiative (ADNI) database ([adni.loni.usc.edu](http://adni.loni.usc.edu)). As such, the investigators within the ADNI contributed to the design and implementation of ADNI and/or provided data but did not participate in analysis or writing of this report. A complete listing of ADNI investigators can be found at [http://adni.loni.usc.edu/wp-content/uploads/how\\_to\\_apply/ADNI\\_Acknowledgement\\_List.pdf](http://adni.loni.usc.edu/wp-content/uploads/how_to_apply/ADNI_Acknowledgement_List.pdf)*

<sup>d</sup>*Corresponding author: [jussi.tohka@uef.fi](mailto:jussi.tohka@uef.fi)*

---

## Abstract

An important problem that hinders the use of supervised classification algorithms for brain imaging is that the number of variables for single subject far exceeds the number of training subjects available. Deriving multivariate measures of variable importance becomes a challenge in such scenarios. This paper proposes a new measure of variable importance termed sign-consistency bagging (SCB). The SCB captures variable importance by analyzing the sign consistency of the corresponding weights in an ensemble of linear support vector machine (SVM) classifiers. Further, the SCB variable importances are enhanced by means of transductive conformal analysis. This extra step is important when the data can be assumed to be heterogeneous. Finally, the proposal of these SCB variable importance measures is completed with the derivation of a parametric hypothesis test of variable importance.

The new importance measures were compared with a t-test based univariate and an SVM-based multivariate variable importances using anatomical and functional magnetic resonance imaging data. The obtained results demonstrated that the new SCB based importance measures were superior to the compared methods in terms of reproducibility and classification accuracy.

*Keywords:* Bagging, Support Vector Machines, variable importance, MRI, Alzheimer’s disease, schizophrenia

---

## 1. Introduction

Machine learning is a powerful tool to characterize disease related alterations in brain structure and function. Given a training set of brain images and the associated class information, here a diagnosis of the subject, supervised machine learning algorithms learn a voxel-wise model that captures the class information from the brain images. This has direct applications to the design of imaging biomarkers, and the inferred models can additionally be considered as multivariate, discriminative representations of the effect of the disease to brain images. This representation is fundamentally different from conventional brain maps that are constructed based on a voxel-by-voxel comparison of two groups of subjects (patients and controls) and the patterns of important voxels in these two types of analyses provide complementary information (Kerr et al., 2014; Haufe et al., 2014; Tohka et al., 2016).

An important problem in using voxel-based supervised classification algorithms for brain imaging applications is that the dimensionality of data (the number of voxels in the images of a single subject, i.e., the number of

variables<sup>1</sup>) far exceeds the number of training subjects available. This has led to a number of works studying variable selection within brain imaging (see Mwangi et al. (2014) for a review). However, in addition to selecting a set of important variables, it is interesting to rank and study their importance to the classification. This problem, termed variable importance determination, has received significantly less attention and it is the topic of this paper.

The simplest approach to variable importance is to study the correlation between the variable and the class label, for example, via a t-test. This is exactly what massively univariate analysis does. It considers variables independently of others and, therefore, may miss complex interactions. Indeed, a variable can be meaningful for the classification despite not presenting any linear relationship with the class label (Haufe et al., 2014). Further, there is evidence that this importance measure does not perform well for variable selection in discrimination tasks (Chu et al., 2012; Tohka et al., 2016) and, therefore, multivariate importance measures might be more appropriate.

With machine learning based variable importance, one has to stick to methods in which the contribution of each variable to the final result can be somehow isolated. Instances of this class of methods are linear methods, in which each variable receives an individual weight; and random forests with trees in which each node just uses a single variable. On the contrary, methods such as nearest neighbors, neural networks, and most kernel machines, are not suitable for this purpose since it is not possible to isolate the contribution of each input variable.

---

<sup>1</sup>In most scenarios relevant to this work, a single variable corresponds to a single voxel, but this does not have to be the case.

40 If the variables have been properly standardized, the weights of a linear  
 41 classifier can be considered as measures of variable importance (Caragea  
 42 et al. (2001), see, e.g, Cohen et al. (2010); Khundrakpam et al. (2015) for  
 43 neuroimaging examples). Linear regressors can be endowed with Lasso and  
 44 Elastic Net regularizations (Friedman et al., 2008; Zou and Hastie, 2005), in  
 45 order to deal with problems with very large number of input variables. These  
 46 regularizations force sparsity and remove variables of reduced relevance from  
 47 the linear model, enhancing the contribution of the remaining variables. More  
 48 elaborated methods take a further step in the exploitation of the relationship  
 49 between the weight of each variable in a linear classifier/regressors and its  
 50 relevance (Guyon et al., 2002). The starplots method of Bi et al. (2003)  
 51 exploits an ensemble of linear support vector regressors (SVR) endowed with  
 52 a Lasso type regularization in the primal space. The regularization filters out  
 53 the non-relevant variables from each regressor, while the starplots look for  
 54 patterns in the weights that correspond with each of the non-filtered variables  
 55 achieves across all the regressors in the ensemble. In addition to the high  
 56 computational burden of some of these methods, in very high dimensional  
 57 problems, they can also present the limitation of reducing dramatically the  
 58 number of input variables to a final quantity comparable to the number of  
 59 training samples. This drawback brings as a consequence that in those cases  
 60 in which a large group of highly correlated variables becomes important,  
 61 only a small fraction of these variables in the group will end up receiving  
 62 importance since a large fraction of the group members will be removed by  
 63 the regularization as their contribution to the final classification is already  
 64 contained in the selected members of the group. To combat this problem,



for example, Grosenick et al. (2013) and Michel et al. (2011) have introduced brain imaging specific regularizers which take into the account the spatial structure of the data. The application of these methods is complicated by a challenging parameter selection (Tohka et al., 2016) and deriving a variable-wise importance measure is complicated by the joint regularization of weights of the different variables.

Some of the most widely used variable importance measures within the machine learning community rely on Random Forests (RFs) (Breiman, 2001). RFs are defined as ensembles of decision trees, where each tree is trained with a subset of available training subjects and with a subset of the available variables. RFs offer two main avenues for assessing the variable importance: one based on Gini importance and one based on the analysis of out-of-bag samples (sometimes called permutation importance) (Archer and Kimes, 2008). Both measures have found applications in brain imaging: Langs et al. (2011) studied voxel selection based on Gini importance, Moradi et al. (2015) ranked the different types of variables (imaging, psychological test scores) for MCI-to-AD conversion prediction based on the out-of-bag variable importance and Greenstein et al. (2012) ranked the importance of cortical ROI volumes to schizophrenia classification. However, these applications have considered at most tens of variables while our focus is on a voxel-wise analyses of whole brain scans, where we have tens of thousands variables. Indeed, the usability of RFs as base learners for the ensemble is very limited in very high dimensionality scenarios. In RFs each decision tree comes out of a training set that includes a sample of the observations and of the variables. In a data set in which the number of variables is far larger than the number of observations

each tree definition will rely on a very reduced set of variables (in the order of a fraction of the number of observations). This means that in order to get all the input variables committed in the definition of a significant number of members of the ensemble, so that the aforementioned patterns can be detected, each forest must contain an extraordinarily large number of trees, and this makes the method computationally infeasible. In addition, each tree presents a strong view of the interactions between the variables involved in its definition but an extremely weak view of the interactions with variables not used in the definition of the splits.

To overcome the limitations of the regularized linear models and RFs for variable importance, we introduce and study a new variable importance measure based on sign consistency of the weights in an ensemble of linear Support Vector Machines (SVMs). Briefly, we train an ensemble of SVMs using only a part of the subjects available for each SVM in the ensemble. The main idea is to define the importance of a variable using its sign consistency, i.e., the fraction of members of the ensemble in which its weight is positive (or negative). We thereafter prune the variable importances using the ideas from transductive conformal analysis inputting randomly labeled data into the method. To complete our proposal, we also derive parametric estimates of significance of the variable importance measures and show that the new importance measures are an improvement to the SVM-weight based p-value estimation (Gaonkar and Davatzikos, 2013). We have earlier applied a similar procedure to variable selection (Parrado-Hernández et al., 2014), and a preliminary work to extend the method for variable importances was presented in the conference proceedings (Gomez-Verdejo et al., 2016). This

paper significantly extends the previous method analysis, as well as the experiments of the conference paper; besides, it presents a novel hypothesis test approach to variable selection based on the variable importance measure. This approach offers much better stability than the cross-validation based procedure and is by an order of magnitude faster.

## 2. Methods

### 2.1. Variable importance with ensembles of linear SVMs

We start by introducing the notation. Let there be  $N$  subjects, where the subject  $i$  is characterized by the set of variables (image)  $\mathbf{x}_i = [x_{i1}, \dots, x_{iP}]$ . We assume that the values  $x_{ij}$  are always positive; if this requirement is not satisfied naturally, it can be always ensured by adding a suitable constant to the values. We consider only binary classification problems. The training labels are denoted by  $y_i \in \{-1, 1\}$ . The predicted label  $\hat{y}$  for the test image  $\mathbf{x}$  is given by  $\hat{y} = \text{sign}(w_0 + \mathbf{w}^T \mathbf{x}) \doteq g(\mathbf{x})$ , where the classifier parameters  $w_0$  and  $\mathbf{w} = [w_1, w_2, \dots, w_P]^T$  are learned from training data via SVMs.

This paper builds on the variable selection method of Parrado-Hernández et al. (2014) that we call here sign consistency bagging (SCB). We train  $S$  linear SVMs, each with a different subset of training data selected at random without replacement. The SVM  $s$ -th in the ensemble is described by the weights  $[w_0^s, w_1^s, \dots, w_P^s]$ , where  $s = 1, \dots, S$ . Once the ensemble is trained, the voxels can be sorted in descending order according to the sign consistency observed in their corresponding weights in all the classifiers that form the ensemble. Voxels whose weights show the same sign in all the classifiers are placed at the top of the list. In essence, we estimate the probability that the

139 sign of  $w_j$  is positive

$$\hat{p}_j = \frac{\sum_{s=1}^S p_j^s}{S} \quad (1)$$

140 where  $p_j^s = 1$  if  $w_j^s > 0$  and  $p_j^s = 0$  otherwise. Similarly, we can define the  
 141 probability that the sign of  $w_j$  is negative as  $1 - \hat{p}_j$  and, then we define the  
 142 importance score  $I_j \in [0, 1]$  for the variable  $j$  as

$$I_j = 2 \max(\hat{p}_j, 1 - \hat{p}_j) - 1 = 2|\hat{p}_j - 0.5|. \quad (2)$$

143 The importance score of 1 signifies highly important variable and the impor-  
 144 tance score of 0 signifies unimportant variable.

145 There is a strong correlation between the sign consistency of the variable  
 146 and its discriminative capacity. Since  $x_{ij}$  is always positive, it is the sign  
 147 of the weight  $w_j^s$  which decides the contribution of the product  $w_j^s x_{ij}$  to  
 148 the classifier in all training subjects. A variable that systematically appears  
 149 with the same sign in most of the classifiers of the ensemble presents robust  
 150 discriminative power: its value is indicative of one of the classes. On the  
 151 other hand, the sign fluctuations of the non-consistent variables (showing  
 152 both signs in significant proportions) indicate that they are not relevant for  
 153 the classification or that their relevance depends on each particular subject,  
 154 what leads to conclude that their importance is lower. Moreover, since the  
 155 SVMs of the ensemble have been trained with an  $L_2$  norm regularization  
 156 that does not enforce sparsity in the primal space, there typically is no zero  
 157 weights. This means that every variable receives an importance score. We  
 158 also argue that since the variable importance is computed at the ensemble  
 159 level, the results are more robust than those variable importances computed  
 160 at the individual classifiers level.

161 The  $L_2$  norm regularization deals with brain areas formed by highly cor-  
 162 related variables by splitting the magnitude of the weights among all the  
 163 correlated variables, thus preserving the regional organization of the signal.  
 164 This makes the selected voxels/variables appear in disjoint compact clusters  
 165 with all voxels/variables in a same cluster having the same sign, what forms  
 166 a **variable importance pattern**.

167 Finally, learning thousands of classifiers does not involve a dramatic com-  
 168 putational load since the  $L_2$  norm SVM may be optimized in the dual space  
 169 where the number of training instances is in the order of tens to hundreds.

## 170 *2.2. Transductive refinement of variable importance*

171 Classification tasks in brain imaging are ultimately related to localized  
 172 alterations of the brain structure or function. This means that most variables  
 173 in a brain scan are not related to the disease. In fact, most variables in a  
 174 brain scan contribute to separate that brain from the others. In Parrado-  
 175 Hernández et al. (2014), the identification of relevant variables is enhanced  
 176 by borrowing certain ideas from transductive learning and conformal anal-  
 177 ysis. Transduction refers to learning scenarios in which one has access to  
 178 the observations, but not the labels, of the test set (see Gammerman et al.  
 179 (1998) on why this does not lead to a testing on training data problem).  
 180 In a nutshell, conformal analysis would assess to what extent each potential  
 181 label that could be assigned to a test example conforms the training data.  
 182 For example, consider a binary classification problem to be solved with an  
 183 SVM. The training examples belonging to each class determine a classifica-  
 184 tion margin that depends on the separability of the class supports. Now a  
 185 new (unlabeled) test sample arrives. If this sample were of the positive class,

one could insert it with a positive label in the training set and re-learn the SVM, arriving to a new margin. Analogously one could re-learn the SVM inserting the test sample as a negative one and arriving to a new margin, different to the previous one achieved if the test sample were considered positive. Conformal analysis would look at these two potential new margins and suggest assigning the test sample to the class that ends up in the margin that better conforms to the training data.

Here, we generalize the refinement procedure of Parrado-Hernández et al. (2014) to variable importances and formulate it in a more general context while the original procedure was limited to the leave-one-out scenario. We call the resulting importance measure SCBconf and denote the importance as  $I_j^{\text{conf}}$  to separate them from SCB importances  $I_j$  of the previous subsection.

Let  $\mathbf{u}_1^r, \dots, \mathbf{u}_M^r$  be a subset of  $M$  testing data selected randomly in the  $r$ -th conformal iteration with  $r = 1, \dots, R$ . Now,  $M$  independent labellings  $a_1^r, \dots, a_M^r$  are generated at random. Label  $a_i^r$  is the one generated for sample  $\mathbf{u}_i^r$  in the  $r$ -th conformal iteration. Notice that the correct labels of these test samples are never used along this procedure because they are not accessible. For each of these iterations, we compute the importance measures  $I_j(r)$ ,  $j = 1, \dots, P$ , based on the training data  $\mathbf{x}_1, \dots, \mathbf{x}_N$ , the test samples  $\mathbf{u}_1, \dots, \mathbf{u}_M$  and the labels  $y_1, \dots, y_N, a_1^r, \dots, a_M^r$ . After running  $R$  iterations, we set

$$I_j^{\text{conf}} = \min_r I_j(r). \quad (3)$$

The definition of  $I_j^{\text{conf}}$  in essence leads to declare as important those variables that turn out to be important in all of the  $R$  labellings. The underlying intuition is that the importance of variables that yield a high  $I_j(r)$  in a few the subsets, but not in all of them, strongly depends on particular labellings.

Therefore these variables should not be selected as their importances are not aligned with the labeling that leads to the disease discrimination, but labellings that stress other partitions not relevant for the characterization of the disease.

### 2.3. Hypothesis test for selecting important variables

The previous subsections have introduced two scorings,  $I_j$  and  $I_j^{\text{conf}}$ , able to assess the relevance of the variables. This subsection presents a methodology to fix qualitative thresholds so that variables with scorings above the threshold can be considered as relevant for the classification and variables with scorings below the threshold can be safely discarded since their importance is reduced. For this purpose, we adopt a probabilistic framework in which the sign of the weight of variable  $j$  in the SVM of bagging iteration  $s$ ,  $\text{sign}(w_j^s)$ , follows a Bernoulli distribution with unknown parameter  $p_j \in (0, 1)$ ; this indicates that  $w_j$  takes positive and negative values across the  $S$  classifiers with probabilities  $p_j$  and  $1 - p_j$ , respectively. In this framework, an irrelevant variable  $j$  is expected to yield positive and negative values in  $w_j$  with the same probability, thus one would declare variable  $j$  as irrelevant if  $p_j = 0.5$  with high probability. A natural way of formulating this scenario is the following hypothesis test:

$$\begin{cases} H_0 : p_j = 0.5, & j \text{ is not relevant} \\ H_1 : p_j \neq 0.5, & j \text{ is relevant} \end{cases} \quad (4)$$

which we can use to detect relevant variables by rejecting the null hypothesis. We propose to solve the test (4) with an statistic  $z_j$  that relates the actual value of  $p_j$  with its estimate  $\hat{p}_j$ :

$$z_j = \frac{\hat{p}_j - p_j}{\sqrt{\text{Var}\{\hat{p}_j\}}}. \quad (5)$$

232 We remind that the estimate  $\hat{p}_j$  is computed as the sample mean of the  
233 observed signs of  $w_j^s$

$$\hat{p}_j = \frac{\sum_{s=1}^S p_j^s}{S} \quad (6)$$

234 where  $p_j^s = 1$  if  $w_j^s > 0$  and  $p_j^s = 0$  otherwise.

In the typical case, where the sample independence assumption would hold,  $\text{Var}\{\hat{p}_j\} = \hat{\sigma}_j^2/S$ , where  $\hat{\sigma}_j^2$  is the estimated variance of the Bernoulli variable  $j$ . However, as the observations come from a bagging process, they are correlated and independence cannot be assumed. Therefore, we resource to the following unbiased estimator of  $\text{Var}\{\hat{p}_j\}$ , proposed by Nadeau and Bengio (2003) <sup>2</sup>:

$$\text{Var}\{\hat{p}_j\} = \left( \frac{1}{S} + \frac{\rho}{1-\rho} \right) \hat{\sigma}_j^2$$

where  $\rho$  represents the correlation among samples. Moreover, according to Nadeau and Bengio (2003), since the bagging corresponds to a scenario in which, at each iteration,  $n_1$  samples are used for training the SVM and  $n_2 = N - n_1$  are left out,  $\rho$  can be estimated as  $n_2/(n_1 + n_2)$ ; since the proposed bagging scheme use  $n_1 = \gamma N$  training samples in each iteration, we can approximate  $\rho$  with  $1 - \gamma$  and, noticing also that  $S \gg 1$ , we can get that

$$\text{Var}\{\hat{p}_j\} = \left( \frac{1}{S} + \frac{1-\gamma}{\gamma} \right) \hat{\sigma}_j^2 \simeq \frac{1-\gamma}{\gamma} \hat{\sigma}_j^2.$$

---

<sup>2</sup>According to Nadeau and Bengio (2003) this approximation of the variance is good enough because our scenario presents a case in which the decision function of the SVM does not change much across the training sets of the different bagging iterations.



235 Finally, the variance of the Bernoulli variables can be estimated as  $\hat{\sigma}_j^2 =$   
 236  $\hat{p}_j(1 - \hat{p}_j)$  from the observations. With these approximations, the statistic  $z_j$   
 237 of (5) becomes

$$z_j = \frac{\hat{p}_j - p_j}{\sqrt{\frac{1-\gamma}{\gamma} \hat{p}_j(1 - \hat{p}_j)}}. \quad (7)$$

238 The statistic  $z_j$  of (7) follows a t-student distribution with  $S - 1$  degrees  
 239 of freedom (Nadeau and Bengio, 2003). When  $S$  is large enough, as it hap-  
 240 pens in our case, one can safely approximate the statistic distribution by  
 241 a standard Gaussian with zero mean and unit variance. Therefore, with a  
 242 significance level  $\alpha$ , we will reject the null hypothesis if either  $z < z_{\alpha/2}$  or  
 243  $z > z_{1-\alpha/2}$ , being  $z_{\alpha/2}$  and  $z_{1-\alpha/2}$  the percentiles of the normalized Gaussian  
 244 distribution at values  $\alpha/2$  and  $1 - \alpha/2$ , respectively.

245 This section closes with a note on the interplay of the hypothesis test  
 246 and the transductive refinement of Subsection 2.2. The selection of  $I_j^{\text{conf}}$  as  
 247 the minimum of the  $R$  scorings  $I_j(r)$  is equivalent to select as  $\hat{p}_j^{\text{conf}}$  the  $\hat{p}_{j,r}$   
 248 that lies closest to 0.5. The  $z_j^{\text{conf}}$  can be then computed using Eq. (7) and  
 249 substituting  $\hat{p}_j$  by  $\hat{p}_j^{\text{conf}}$ . An equivalent definition would be to select  $z_j$  with  
 250 the smallest absolute value among the  $R$  candidates.

## 251 2.4. Implementation

252 Algorithms 1 and 2 sketch the implementation of the method to assess  
 253 variable importance and its version with transductive refinement, respec-  
 254 tively. In both cases, the ensemble of linear SVMs is run a total of  $S = 10.000$   
 255 bagging iterations. In each iteration, half of the available training data  
 256 ( $\gamma = 0.5$ ) is selected as training set. The SVM regularization parameter  
 257  $C$  was fixed to 100. All the used training sets involve very high dimensional

---

**Algorithm 1** Sign Consistency Bagging

---

**Input:**  $X$ :  $N \times P$  matrix with training brain scans (each row is a subject, each column a variable );  $\mathbf{y}$ : vector with the labels corresponding to the rows of  $X$

**Output:**  $I$ :  $P \times 1$  vector with voxel relevances;  $\mathbf{z}$ :  $P \times 1$  vector with significance statistic

```

1:  $\hat{\mathbf{p}} \leftarrow [0, \dots, 0]$  vector with  $P$  zeros
2: for  $s = 1$  to  $S$  do
3:    $X_s, \mathbf{y}_s \leftarrow$  randomly sample  $\gamma N$  training samples
4:    $\mathbf{w}^s \leftarrow \text{LinearSVM}(X_s, \mathbf{y}_s)$ 
5:   for  $j = 1$  to  $P$  do
6:     if  $w_j^s > 0$  then
7:        $\hat{p}_j \leftarrow \hat{p}_j + 1$ 
8:  $I = []$ 
9:  $\mathbf{z} = []$ 
10: for  $j = 1$  to  $P$  do
11:    $\hat{p}_j \leftarrow \hat{p}_j / S$ 
12:    $I_j \leftarrow 2 \max(\hat{p}_j, 1 - \hat{p}_j) - 1$ 
13:   Compute score  $z_j$  using (7)

```

---

---

**Algorithm 2** Sign Consistency Bagging with transductive refinement

---

**Input:**  $X$ :  $N \times P$  matrix with training brain scans (each row is a subject, each column a variable );  $\mathbf{y}$ : vector with the labels corresponding to the rows of  $X$ ;  $X_t$ :  $N_t \times P$  matrix with testing brain scans

**Output:**  $\mathbf{I}^{\text{conf}}$ :  $P \times 1$  vector with variable relevances;  $\mathbf{z}$ :  $P \times 1$  vector with significance statistic

```

1:  $I \leftarrow []$  empty  $P \times R$  matrix
2: for  $r = 1$  to  $R$  do
3:    $U^r \leftarrow$  randomly sample  $M$  testing observations from matrix  $X_t$ 
4:    $A^r \leftarrow$  randomly generate a label  $a_m^r$  per each  $\mathbf{u}_m^r$ ,  $m = 1, \dots, M$ 
5:    $\hat{\mathbf{p}}(r) \leftarrow [0, \dots, 0]$  vector with  $P$  zeros
6:   for  $s = 1$  to  $S$  do
7:      $X_s, \mathbf{y}_s \leftarrow$  randomly sample  $\gamma N$  training data
8:      $\hat{X}_s^r \leftarrow [X_s; U^r]$ 
9:      $\hat{\mathbf{y}}_s^r \leftarrow [\mathbf{y}_s; \mathbf{a}^r]$ 
10:     $\mathbf{w}^s \leftarrow \text{LinearSVM}(\hat{X}_s^r, \hat{\mathbf{y}}_s^r)$ 
11:    for  $j = 1$  to  $P$  do
12:      if  $w_j^s > 0$  then
13:         $\hat{p}_j(r) \leftarrow \hat{p}_j(r) + 1$ 
14:    for  $j = 1$  to  $P$  do
15:       $\hat{p}_j(r) \leftarrow \hat{p}_j(r)/S$ 
16:       $I_j(r) \leftarrow 2 \max(\hat{p}_j, 1 - \hat{p}_j) - 1$ 
17:  $\mathbf{I}^{\text{conf}} \leftarrow []$  empty vector with  $P$  elements
18: for  $j = 1$  to  $P$  do
19:    $I_j^{\text{conf}} \leftarrow \min_r I_j(r)$ 
20:    $b \leftarrow \arg \min_r I_j(r)$ 
21:    $\hat{p}_j^{\text{conf}} \leftarrow \hat{p}_j(b)$ 
22:   Compute score  $z_j$  using (7) and  $\hat{p}_j^{\text{conf}}$ 

```

---

258 problems and this value of  $C = 100$  was observed to be large enough to solve  
259 properly these linearly separable problems.

260 If any of the training sets present unbalanced class proportions, the sub-  
261 sampling process at each bagging iteration corrects it by sampling the same  
262 number of data for each class.

263 In the case the transductive refinement is applied, the number of confor-  
264 mal iterations is set to  $R = 20$ . For each of these iterations, the number of  
265 selected test data,  $M$ , has been fixed in such a way that no more than one  
266 or two test data samples is used per each 100 training samples.

267 The hypothesis test described in Subsection 2.3 to identify the subset of  
268 important variables is applied with a significance level of  $\alpha = 0.05$ . Note  
269 that, as parameter  $\gamma$  is set to 0.5, the statistic in (7) becomes:

$$z_j = \frac{\hat{p}_j - p_j}{\sqrt{\hat{p}_j(1 - \hat{p}_j)}}. \quad (8)$$

270 Finally, the overall goodness of the proposed variable importance mea-  
271 sure is evaluated by checking the discriminative capabilities of a linear SVM  
272 trained using only the important variables. This SVM has also to be trained  
273 with  $C = 100$ , since in most cases there still are more variables than samples.  
274 However, unlike in the bagging iterations, in this final classifier the class im-  
275 balance is solved by using a re-weighting the regularization parameter of the  
276 samples of the minority class in the training of the SVM. This way the con-  
277 tribution of the samples of both minority and majority class to the SVM loss  
278 function is equalized. This is an standard procedure within SVM, contained  
279 in most SVM implementations (Chang and Lin, 2011).

280 The software implementation of all the methods has been developed in

281 Python<sup>3</sup>. The SVM training relies on the Scikit-learn package (Pedregosa  
282 et al., 2011) which is based on the LIBSVM of (Chang and Lin, 2011).

### 283 3. Materials

#### 284 3.1. Simulated data

285 We generated 10 simulated data sets to evaluate the method against  
286 known ground-truth and to demonstrate characteristics of the different vari-  
287 able selection/importance methods with a relatively simple classification  
288 task. The datasets contained 100 controls and 100 patients and had 29852  
289 voxels similarly to ADNI data in the next subsection.

290 The simulations were based on the AAL atlas (Tzourio-Mazoyer et al.,  
291 2002), downsampled to  $4mm^3$  voxel-size. We selected six regions as impor-  
292 tant modeling dementia related changes. The voxels of these regions are given  
293 in sets  $R_1, \dots, R_6$  which are left and right Hippocampus ( $R_1, R_2$ ), Thalamus  
294 ( $R_3, R_4$ ), and Superior Frontal Gyrus ( $R_5, R_6$ ). Each of these regions were  
295 assigned a degree of importance, described by a parameter  $\delta_k$  that we set to  
296 have the value 1. We simulated each important region to have correlated vox-  
297 els (within a class), to make the task of finding them difficult for multivariate  
298 variable selection/importance methods. The voxel intensity for  $i \in R_k$  was  
299 simulated as

$$x_{ij} = (1/|R_k|) \sum_{i \in R_k} (\delta_k + b_j + e_{ij}) + v_{ij}, \quad (9)$$

---

<sup>3</sup>See this Python notebook for examples <https://github.com/vgverdejo/ResearchActivities/blob/master/Neuroimage/Sign-consistency.ipynb>

300 if a patient was modeled, and

$$x_{ij} = (1/|R_k|) \sum_{i \in R_k} (b_j + e_{ij}) + v_{ij}, \quad (10)$$

301 for a healthy control. The voxel intensity for noise voxels was simply  $x_{ij} = e_{ij}$   
 302 independently from the class of  $j$ , and  $e_{ij}, v_{ij}, b_j$  were drawn from zero-mean  
 303 Gaussian distributions with variances 1, 0.01, 0.01, respectively. Thereafter,  
 304 we added white noise with the variance  $\sqrt{2}$  projected to the Bayes-optimal  
 305 decision hyperplane to the meaningful voxels. This operation maintains the  
 306 Bayes error rate, but it makes the task of finding important voxels more  
 307 difficult. Finally, we smoothed the images with a filter with an isotropic 4-  
 308 mm FWHM Gaussian kernel to model the smoothness in brain images. The  
 309 Bayes error for this data was 2.2 %. To evaluate the classification accuracy  
 310 of the methods, we simulated a large test set with the same parameters as  
 311 the training set.

### 312 3.2. ADNI data

313 A part of the data used in the preparation of this article were obtained  
 314 from the Alzheimer’s Disease Neuroimaging Initiative (ADNI) database ([adni.loni.usc.edu](http://adni.loni.usc.edu)).  
 315 The ADNI was launched in 2003 as a public-private part-  
 316 nership, led by Principal Investigator Michael W. Weiner, MD. The primary  
 317 goal of ADNI has been to test whether serial magnetic resonance imaging  
 318 (MRI), positron emission tomography (PET), other biological markers, and  
 319 clinical and neuropsychological assessment can be combined to measure the  
 320 progression of mild cognitive impairment (MCI) and early Alzheimers disease  
 321 (AD). For up-to-date information, see [www.adni-info.org](http://www.adni-info.org).

We studied the classification between MCI and healthy subjects (NCs) with the ADNI data. This problem is more challenging than NC vs. AD classification (Tohka et al., 2016) and therefore offers better insight into the capabilities for different variable importance methods. (We did not consider stable vs progressive MCI classification as the number of MCI subjects is not large enough for the reproducibility analysis performed with this data; see (Tohka et al., 2016) for a more detailed discussion). We used MRIs from 404 MCI subjects and 231 normal controls (NC) for whom baseline MRI data (T1-weighted MP-RAGE sequence at 1.5 Tesla, typically 256 x 256 x 170 voxels with the voxel size of 1 mm x 1 mm x 1.2 mm) were available. The MRIs were preprocessed into gray matter tissue images in the stereotactic space, as described by (Gaser et al., 2013; Moradi et al., 2015), and thereafter they were smoothed with the 8-mm FWHM Gaussian kernel, resampled to 4 mm spatial resolution and masked into 29852 voxels. We age-corrected the data by regressing out the age of the subject on a voxel-by-voxel basis (Moradi et al., 2015). This has been observed to improve the classification accuracy in dementia related tasks (Tohka et al., 2016; Dukart et al., 2011) due to overlapping effects of normal aging and dementia on the brain.

With these data, we studied the reproducibility of variable importance using split-half resampling (aka 2-fold cross-validation) akin to the analysis performed by Tohka et al. (2016). We sampled without replacement 100 subjects from each of the two classes, NC and MCI, so that  $N = 200$ . This procedure was repeated  $L = 100$  times. We denote the two subject samples (split halves; train and test) by  $A_i$  and  $B_i$  for the iteration  $i = 1, \dots, L$ . The sampling was without replacement so that the split-half sets  $A_i$  and  $B_i$  were

always disjoint and therefore can be considered as independent train and test sets. The algorithms were trained on the split  $A_i$  and tested on the split  $B_i$  and, vice versa, trained on  $B_i$  and tested on  $A_i$ . All the training operations, including the estimation of regression coefficients for age removal, were done in the training half. The test half was used only for the evaluation of the algorithms.

### 3.3. COBRE data

To demonstrate the applicability of the method for the resting state fMRI analysis, we used the pre-processed version of the COBRE sample (Bellec et al., 2015) that can be downloaded from <sup>4</sup>. The dataset, which is a derivative of the COBRE sample found in International Neuroimaging Data-sharing Initiative (INDI)<sup>5</sup>, originally released under Creative Commons – Attribution Non-Commercial, includes preprocessed resting-state functional magnetic resonance images for 72 patients diagnosed with schizophrenia (58 males, age range = 18-65 yrs) and 74 healthy controls (51 males, age range = 18-65 yrs). The fMRI dataset features 150 EPI blood-oxygenation level dependent (BOLD) volumes (TR = 2 s, TE = 29 ms, FA = 75 degrees, 32 slices, voxel size = 3x3x4 mm<sup>3</sup>, matrix size = 64x64) for each subject.

We processed the data to display voxel-wise estimates of the long range functional connectivity (Guo et al., 2015). It is well documented that disruption of intrinsic functional connectivity is common in schizophrenia patients, as well as it depends on connection distance (Wang et al., 2014; Guo et al.,

---

<sup>4</sup>[https://figshare.com/articles/COBRE\\_preprocessed\\_with\\_NIAK\\_0\\_12\\_4/1160600](https://figshare.com/articles/COBRE_preprocessed_with_NIAK_0_12_4/1160600)

1160600

<sup>5</sup>[http://fcon\\_1000.projects.nitrc.org/indi/retro/cobre.html](http://fcon_1000.projects.nitrc.org/indi/retro/cobre.html)



2015). First, the fMRIs were preprocessed using the NeuroImaging Analysis Kit (NIAK <sup>6</sup>) version 0.12.14 as described at <sup>4</sup>. Summarizing, for each fMRI data the preprocessing included slice timing correction and motion correction using a rigid-body transform. Thereafter, the median volume of fMRI of each subject was coregistered with the T1-weighted scan of the subject using the Minctracc tool (Collins and Evans, 1997). The T1-weighted scan was itself non-linearly transformed to the Montreal Neurological Institute (MNI) template (symmetric ICBM152 template with 40 iterations of non-linear coregistration (Fonov et al., 2011)). The rigid-body transform, fMRI-to-T1 transform and T1-to-stereotaxic transform were all combined, and the functional volumes were resampled in the MNI space at a 3 mm isotropic resolution. The scrubbing method of (Power et al., 2012) was used to remove the volumes with excessive motion (frame displacement greater than 0.5 mm). A minimum number of 60 unscrubbed volumes per run, corresponding to 180 s of acquisition, was required for further analysis. For this reason, 16 controls and 29 schizophrenia patients were rejected from the subsequent analyses, yielding 43 patients and 58 healthy controls to be used in the experiment. The following nuisance parameters were regressed out from the time series at each voxel: slow time drifts (basis of discrete cosines with a 0.01 Hz high-pass cut-off), average signals in conservative masks of the white matter, and the lateral ventricles as well as the first principal components of the six rigid-body motion parameters and their squares (Giove et al., 2009). Finally, the fMRI volumes were spatially smoothed with a 6 mm isotropic

---

<sup>6</sup><https://github.com/SIMEXP/niak>

392 Gaussian blurring kernel and the gray matter (GM) voxels were extracted  
393 based on the probabilistic atlas (0.5 was used as the GM probability thresh-  
394 old).

395 Following this preprocessing, we computed the correlations between the  
396 time series of GM voxels which were at at least 75 mm apart from each other.  
397 We use  $N_i^{75}$  to denote the set of voxels at least 75 mm apart from the voxel  
398  $i$  and  $z(r)_{ij}$  to denote the Fisher transformed correlation coefficient between  
399 the voxels  $i$  and  $j$ . Then, two features  $x_i^-, x_i^+$  are defined per voxel:

$$x_i^- = \sum_{j \in N_i^{75}; z(r)_{ij} < 0} -z(r)_{ij}; \quad x_i^+ = \sum_{j \in N_i^{75}; z(r)_{ij} > 0} z(r)_{ij}. \quad (11)$$

400 The long-range connection threshold of 75 mm is rather arbitrary, but it  
401 has been used often to define short and long range connections (e.g. in Guo  
402 et al. (2015); Wang et al. (2014)). We separated the positive and negative  
403 connections following (Guo et al., 2015). This preprocessing yielded altogether  
404 81404 variables, corresponding to two times 40702 GM voxels.

## 405 4. Compared methods

### 406 4.1. SVM with permutation test (SVM+perm)

407 The closest approach to SCBs is training a linear SVM and studying the  
408 importance of the weights of different variables in the SVM by means of a  
409 permutation test (Mouro-Miranda et al., 2005; Wang et al., 2007). Here, we  
410 use an analytic implementation of this approach (Gaonkar and Davatzikos,  
411 2013) based on considering a linearly separable problem (as it is our case  
412 since  $P \gg N$ ) and, thus, approximating the SVM solution by that of the

413 LS-SVM one, which is given by:

$$\mathbf{w} = X^T \left[ (XX^T)^{-1} + (XX^T)^{-1} J \left( -J^T (XX^T)^{-1} J \right)^{-1} J^T (XX^T)^{-1} \right] \mathbf{y} \quad (12)$$

where  $X$  is the  $N \times P$  (number of subjects  $\times$  number of variables) training data matrix,  $\mathbf{y} = [y_1, \dots, y_N]^T$  is the associated class label vector, and  $J$  is a column matrix of ones. On the other hand, considering that the permutation test randomly generate different label values with probabilities

$$P\{y_i = 1\} = p_1 \quad P\{y_i = -1\} = 1 - p_1$$

being  $p_1$  the percentage of patient data, we can define the expected value and variance of the labels during permutations as:

$$\mathbb{E}\{y_i\} = 2p_1 - 1$$

$$\mathbb{V}\text{ar}\{y_i\} = 4p_1 - 4p_1^2$$

414 And using (12), we can obtain the mean and variance of the  $j$ -th SVM weight

415 as:

$$\mathbb{E}\{w_j\} = (2p_1 - 1) \sum_{i=1}^N B_{ij} \quad (13)$$

416

$$\mathbb{E}\{w_j\} = (4p_1 - 4p_1^2) \sum_{i=1}^N B_{ij}^2 \quad (14)$$

where

$$B = X^T \left[ (XX^T)^{-1} + (XX^T)^{-1} J \left( -J^T (XX^T)^{-1} J \right)^{-1} J^T (XX^T)^{-1} \right]$$

417 Thus, we can claim that a variable is relevant with a confidence level of  
418  $\alpha$ , if the probability that a normal distribution, with mean (13) and variance  
419 (14), generates the value  $w_j$  (given by (12)) is in the interval  $[\frac{\alpha}{2}, 1 - \frac{\alpha}{2}]$ .

## 420 4.2. *T-test and Gaussian Naive Bayes (T-test+NGB)*

421 Although the central part of the discussion is focused on the advan-  
 422 tages of SCB over the combination SVM+perm, it is worthy to briefly stress  
 423 some advantages of SCB over a typical univariate filter-based variable selec-  
 424 tion/importance. The most widely used massively univariate approach to  
 425 assess the importance of variables is the application of t-test to each vari-  
 426 able separately. Once these tests are applied, the selection of the variables  
 427 that will be used during the classification can be performed by determining a  
 428 suitable  $\alpha$ -threshold on the outcome of the tests, and selecting as important  
 429 variables those that exceed the corresponding threshold. The classifier that  
 430 consumes the variables selected with the t-test filters is the Gaussian Naive  
 431 Bayes classifier (John and Langley, 1995). As with the other approaches, we  
 432 set the  $\alpha$ -threshold to 0.05, two-sided.

## 433 5. Results

### 434 5.1. *Synthetic data*

435 Table 1 lists the results achieved by the methods under study on the  
 436 synthetic data. We evaluated:

- 437 • the classification accuracy (ACC) computed using a separate and large  
 438 test sample;
- 439 • the sensitivity (SEN) of the variable selection defined as the ratio be-  
 440 tween the number of correctly selected important variables and the  
 441 number of important variables;

- 442 • the specificity (SPE) of the variable selection defined as the ratio be-  
443 tween the number of correctly identified noise variables and the number  
444 of noise variables;
- 445 • the mean absolute error (MAE) defined as:

$$\text{MAE} = \sum_{j \in \mathcal{I}} \hat{\rho}_j / |\mathcal{I}| + \sum_{j \in \mathcal{N}} (1 - \hat{\rho}_j) / |\mathcal{N}|, \quad (15)$$

446 where  $\hat{\rho}_j$  is the estimated p-value for the variable  $j$  to be important (the  
447 lower the p-value the more important the variable), and  $\mathcal{I}, \mathcal{N}$  are the  
448 sets of the important and noise variables, respectively. For the sake of  
449 clarity, we remind that, for the SCB methods,  $\hat{\rho}_j$  values were computed  
450 based on Eq. (8).

451 ACC, SEN, SPE measures depend on a categorization of variables into  
452 important ones and noise. The categorization, since all the studied methods  
453 provide p-values for the variable importance, was determined by a (two-sided)  
454  $\alpha$ -threshold of 0.05.

455 Table 1 shows that the accuracy of SCB methods was substantially better  
456 than either of the competing methods. Indeed, a t-test (not to be confused  
457 with the t-test for variable importance) over the 10 different training sets  
458 indicated a p-value  $< 0.001$  in every case. In addition, the MAEs by the  
459 SCB methods also compared very favorably to baseline approaches (the sta-  
460 tistical significance evaluated with t-tests in the 10 data partitions provided  
461 a p-value  $< 0.05$ ). Notice that the MAE is independent of the thresholds  
462 used to categorize variables as important or not. The specificity (or  $1 - \text{SPE}$ )  
463 values of the methods were interesting as they can be compared to the nomi-  
464 nal  $\alpha$ -threshold of 0.05; it can be noted that SCB without conformal analysis

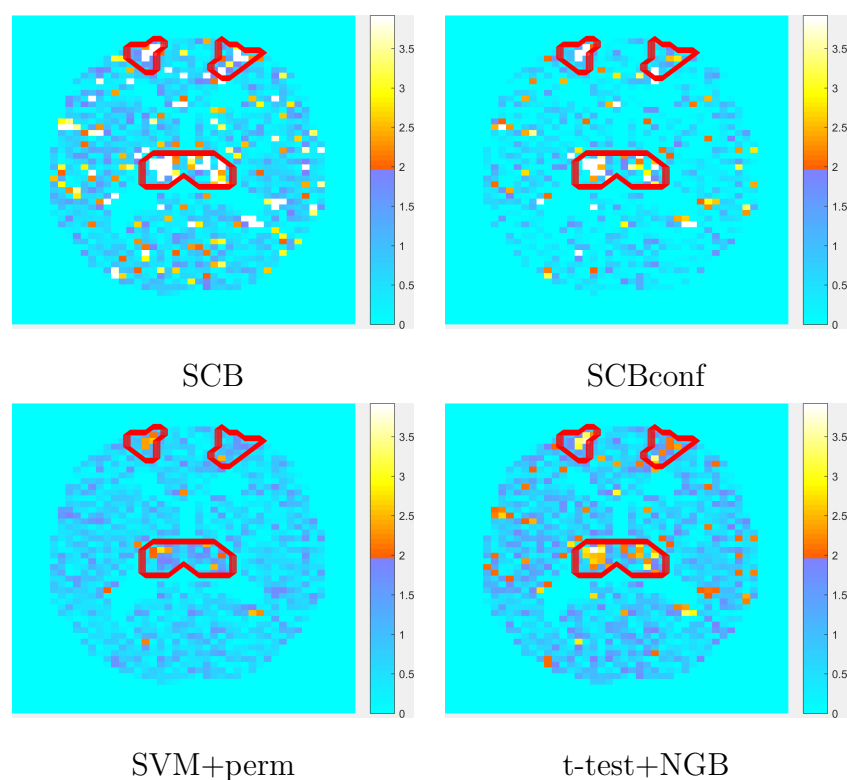

Figure 1: Examples of variable importances on a plane cutting through Thalami and Superior Frontal Gyri. The areas surrounded by red color are important in the ground-truth. The values shown are absolute values of z-scores of the variable importance.

Table 1: Quantitative results with synthetic data. The values shown are averages and standard deviations over 10 different training sets. ACC is the classification accuracy evaluated using a large test set, SEN is the sensitivity of the variable selection, SPE is the specificity of the variable selection, and MAE is the mean absolute error. See the text for details. Variables are selected using the  $\alpha$ -threshold of 0.05.

| Method            | ACC                      | SEN                      | SPE                      | MAE                      |
|-------------------|--------------------------|--------------------------|--------------------------|--------------------------|
| <b>SCB</b>        | <b>0.916</b> $\pm$ 0.004 | <b>0.369</b> $\pm$ 0.013 | 0.889 $\pm$ 0.002        | 0.392 $\pm$ 0.004        |
| <b>SCBconf</b>    | 0.879 $\pm$ 0.008        | 0.208 $\pm$ 0.011        | 0.957 $\pm$ 0.002        | <b>0.380</b> $\pm$ 0.006 |
| <b>SVM+perm</b>   | 0.797 $\pm$ 0.005        | 0.076 $\pm$ 0.004        | <b>0.992</b> $\pm$ 0.001 | 0.411 $\pm$ 0.004        |
| <b>t-test+NGB</b> | 0.818 $\pm$ 0.010        | 0.259 $\pm$ 0.013        | 0.949 $\pm$ 0.002        | 0.396 $\pm$ 0.004        |

465 was too lenient compared to the nominal threshold while the SCBconf well  
466 attained the nominal threshold. SVM+perm was clearly too conservative  
467 and the t-test, as it is expected since the synthetic data holds the t-test as-  
468 sumptions, attained well the nominal level. The examples in Fig. 1 visualize  
469 the same conclusions. Interestingly, as visible in Fig. 1, there was a tendency  
470 for all methods to give a high importance to the same variables. This was as  
471 expected with a relatively simple simulation.

## 472 5.2. ADNI

473 With ADNI data, we performed a split-half resampling (2-fold cross-  
474 validation) type analysis following (Tohka et al., 2016). This analysis informs  
475 us, in addition to the average performance of the methods, about the vari-  
476 ability of variable importances due to different subject samples in the same  
477 classification problem.

478 The quantitative results are listed in Table 2. As in Tohka et al. (2016),

we recorded the test accuracy (ACC) of each algorithm (the fraction of the correctly classified subjects in the test half) averaged across  $L = 100$  resampling iterations. Moreover, we computed the average absolute difference in ACC between the two split-halves, i.e.,

$$\Delta ACC = \frac{1}{L} \sum_{i=1}^L |ACC(A_i, B_i) - ACC(B_i, A_i)|, \quad (16)$$

where  $ACC(A_i, B_i)$  means accuracy when the training set is  $A_i$  and the test set is  $B_i$ . SCBconf and SCB performed similarly in terms of the classification accuracy and  $\Delta ACC$ . SCB methods were significantly more accurate than t-test+NGB (p-value < 0.05) according to a conservative corrected repeated 2-fold CV t-test (Bouckaert and Frank, 2004; Nadeau and Bengio, 2003), which is an improvement of 5X2 CV test of Dietterich (1998) and McNemar’s test (see (Bouckaert and Frank, 2004)). However, this conservative test did not indicate a significant difference between the accuracy of the SCB methods and SVM+perm; although,  $\Delta ACC$  was considerably smaller with the SCB based methods than with the two other methods.

The average number of selected voxels (with the  $\alpha$ -threshold of 0.05) was the smallest with SCBconf and SVM+perm. SCB selected roughly two times more voxels than SCBconf and the t-test was clearly the most liberal selection method. However, when evaluating the standard deviations in the numbers of selected voxels, we note that SCB and SCBconf were the most stable methods in this regard. Especially, the number of voxels selected by SVM+perm varied considerably as demonstrated in Fig. 2. We interpret this as a handicap of SVM+perm as the  $\alpha$ -threshold was the same. Also, the t-test+NGB produced more variation than the SCB-based methods on the



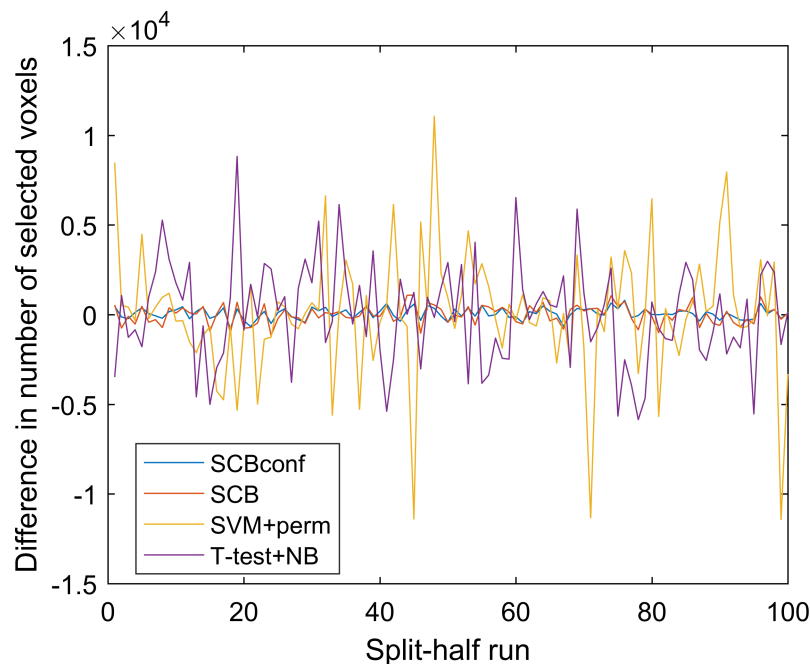

Figure 2: The numbers of selected voxels within each split-half resampling run. The SCB methods were more stable with respect to the number of selected voxels than the other methods. Especially, SVM+perm suffered from an excess variability.

502 numbers of selected voxels.

503 We again computed the MAE measure between p-values computed based  
504 on the two independent training sets. According to this measure, SCBconf  
505 and t-test were the most reproducible (see 2).

506 We quantified the similarity of two voxel sets selected on the split-halves  
507  $A_i$  and  $B_i$  using modified Hausdorff distance (mHD) (Dubuisson and Jain,  
508 1994). This has the advantage of taking into account spatial locations of the  
509 voxels. Let each of the voxels  $\mathbf{a}$  be denoted by its 3-D coordinates  $(a_x, a_y, a_z)$ .

510 Then, the mHD is defined as

$$H(V_A, V_B) = \max(d(V_A, V_B), d(V_B, V_A)), \quad (17)$$

where

$$d(V_A, V_B) = \sum_{\mathbf{a} \in V_A} \min_{\mathbf{b} \in V_B} \|\mathbf{a} - \mathbf{b}\|.$$

511 It was shown in Tohka et al. (2016) that reproducibility measures of the voxel  
 512 selection are correlated with the number of selected voxels. To overcome this  
 513 limitation and make the comparison fair, we here studied standardized sets  
 514 of voxels by forcing each algorithm to select the same number of voxels as  
 515 SCBconf in the split half  $A_i$ . For each algorithm, we then selected the voxels  
 516 in the  $B_i$  according to the  $\alpha$ -threshold obtained for the split-half  $A_i$ . The  
 517 mHD computed using this standardization is denoted by mHDsta in Table  
 518 2. As shown in Table 2, the t-test was the most reproducible according to  
 519 the uncorrected mHD. However, this was an artifact of the over-liberality  
 520 of the test. When standardized with the respect to the number of selected  
 521 voxels (the row mHDsta) , the SCB based methods were most reproducible;  
 522 however, the difference to the t-test was not statistically significant. The  
 523 SVM+perm was clearly and significantly less reproducible than any of the  
 524 other methods.

525 Fig. 3 shows examples of visualized voxel importance maps. All meth-  
 526 ods displayed, for example, Hippocampus and Amygdala as important. An  
 527 interesting difference can be observed in middle frontal gyrus, where there  
 528 was a cluster of highly important voxels according to the SCB methods.  
 529 However, the t-test did not consider these voxels as important. Both SCB  
 530 methods identified several clusters of important voxels, with SCBconf being

Table 2: Quantitative results with the ADNI split-half experiment. The values listed are the averaged values over 100 resampling runs followed, where reasonable, by their standard deviations. mHD and mHDsta are computed in voxels. ACC is the classification accuracy,  $\Delta$ ACC is the variability of the ACC Eq. (16), Nsel is the number of selected voxels, mHD is the modified Hausdorff distance Eq. (17), mHDsta is the modified Hausdorff distance when all methods are forced to selected the same number of variables and MAE is the mean absolute error between the variable importance p-values obtained using independent training sets.

|                               | SCBconf                  | SCB               | SVM+perm          | T-test+NGB               |
|-------------------------------|--------------------------|-------------------|-------------------|--------------------------|
| <b>ACC</b>                    | <b>0.769</b>             | 0.766             | 0.713             | 0.704                    |
| <b><math>\Delta</math>ACC</b> | 0.030                    | <b>0.029</b>      | 0.047             | 0.045                    |
| <b>Nsel</b>                   | 2067 $\pm$ 255           | 4420 $\pm$ 420    | 1884 $\pm$ 2286   | 10253 $\pm$ 2278         |
| <b>mHD</b>                    | 1.536 $\pm$ 0.105        | 1.174 $\pm$ 0.049 | 2.952 $\pm$ 0.843 | <b>0.669</b> $\pm$ 0.144 |
| <b>mHDsta</b>                 | <b>1.536</b> $\pm$ 0.105 | 1.546 $\pm$ 0.111 | 2.938 $\pm$ 3.590 | 1.707 $\pm$ 0.705        |
| <b>MAE</b>                    | <b>0.194</b> $\pm$ 0.006 | 0.278 $\pm$ 0.007 | 0.267 $\pm$ 0.064 | 0.197 $\pm$ 0.020        |

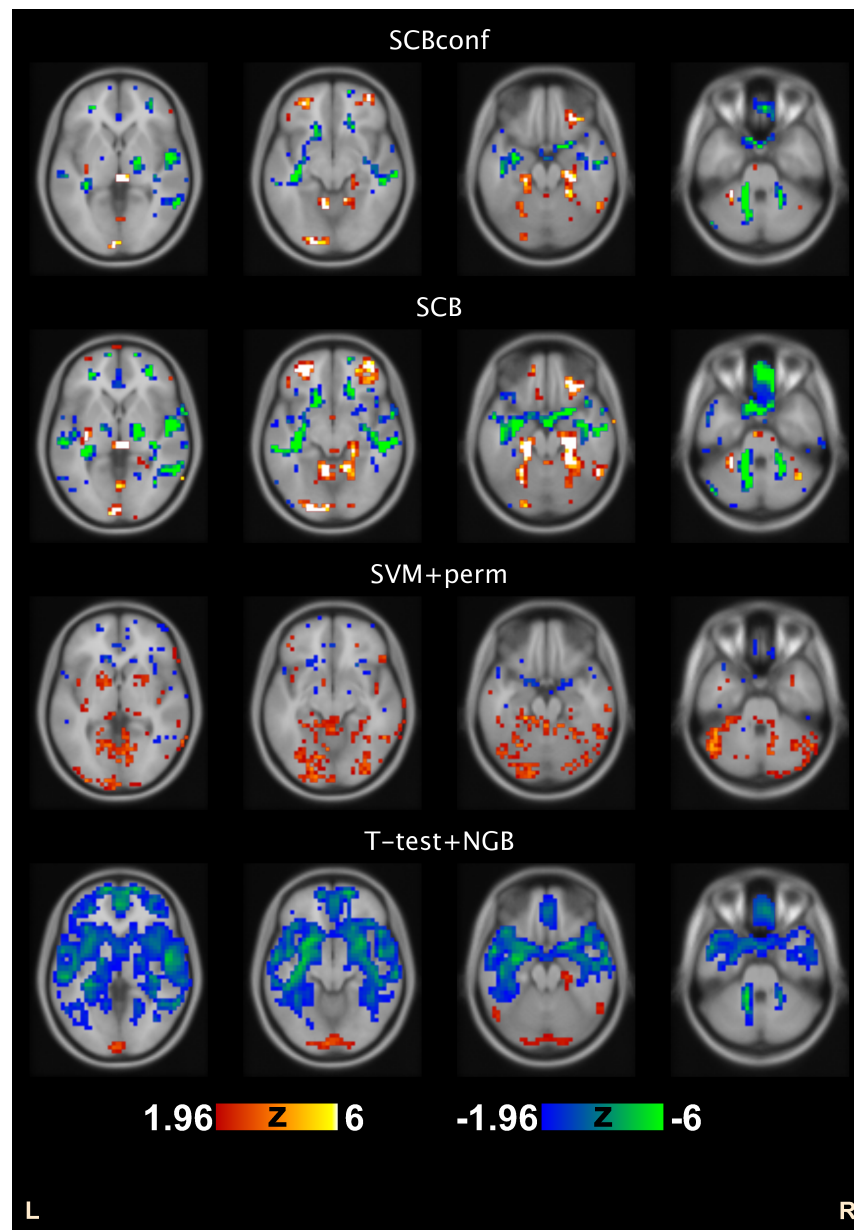

Figure 3: Variable importance Z-scores from a randomly selected example run of the ADNI split-half experiment. The Z-scores are thresholded at  $|Z| > 1.96$ , corresponding to two-sided alpha threshold of 0.05. Positive  $Z$  values indicate positive weights. Axial slices at the z-coordinate of the MNI stereotactic space of 0mm, -10mm -20mm, and -30mm are shown.

531 more conservative. SVM+perm importance appeared to be more scattered  
532 and the t-test was the most liberal selecting many more voxels than the other  
533 methods.

### 534 5.3. COBRE

535 The classification accuracies and numbers of selected voxels with the CO-  
536 BRE data are listed in Table 3. In this experiment, SCBconf was significantly  
537 more accurate than the other methods (p-value always  $< 0.01$ , according  
538 to the corrected resampled t-test (Bouckaert and Frank, 2004; Nadeau and  
539 Bengio, 2003)). The other methods performed similarly in terms of the cross-  
540 validated classification accuracy. This indicates that the conformal analysis  
541 was an essential addition to SCB, probably because the COBRE dataset  
542 can be assumed to be more heterogeneous than the ADNI dataset. The  
543 heterogeneity of COBRE data probably stems from multiple sources. For  
544 example, schizophrenia is often characterized as a heterogeneous disorder  
545 (Seaton et al., 2001), the subjects suffering from schizophrenia were receiv-  
546 ing various medications at the time of scanning (Kim et al., 2016), the age  
547 range of the subjects in the dataset was large, and resting state fMRI is  
548 more prone to noise due to, for example, subject motion than anatomical  
549 T1-weighted MRI. It is particularly in these kinds of applications where we  
550 expect the conformal analysis to be most useful. The classification accuracy  
551 achieved with SCBconf appeared to outperform recent published analyses of  
552 the same data (Chyzhyk et al., 2015; Kim et al., 2016). However, note that  
553 the direct comparison of the classification performance with these works is  
554 not fair, since it is subject to the differences in variable extraction (different  
555 variables were used), data processing (different subjects were excluded) and

556 evaluation (different cross-validation folds were used).

557 The SCBconf selected, on average, 4251 variables and was more conserva-  
558 tive than the plain SCB as expected. SVM+perm was even more moderate,  
559 selecting 2433 variables on average. The number of variables selected by  
560 SVM+perm was less variable then in the ADNI experiment where this vari-  
561 ation was clearly a problem for SVM+perm. The t-test was overly liberal.  
562 Interestingly, the t-test selected many more variables corresponding to the  
563 negative correlation strength (on average 24283) than to the positive corre-  
564 lation strength (on average 2474). Instead, SCB methods and SVM+perm  
565 selected similar numbers of variables corresponding to the positive and neg-  
566 ative correlation strength. This is also visible in Figs. 4 and 5, where the  
567 median magnitudes of the variable importances are visualized (medians of  
568 absolute value of z-scores, see Eq. (8), over 10 CV runs). Concentrating on  
569 the SCBconf, widely distributed and partially overlapping areas were found  
570 to be important for both negative and positive correlation strength. Par-  
571 ticularly, the most important variables (with medians of absolute z-scores  
572 exceeding 15 or equivalent p-values smaller than  $10^{-51}$ ) were found in left  
573 cerebellum, left inferior temporal gyrus, left and right thalamus, left inferior  
574 parietal gyrus, right inferior frontal gyrus, left medial frontal gyrus, and left  
575 middle frontal gyrus for negative correlation strength. For positive correla-  
576 tion strength, median absolute z-scores exceeding 15 were found in left and  
577 right cerebellum, left inferior frontal gyrus, left caudate, right lingual gyrus,  
578 right middle temporal gyrus and left medial frontal gyrus. We note that a  
579 high z value of 15 was selected as threshold in this discussion to concentrate  
580 only to the most important variables. We have made the complete maps

Table 3: Average accuracy and number of selected voxels with the 10-fold CV with the COBRE experiment. The values after  $\pm$  refer to the standard deviations over 10 CV-folds.

|             | SCBconf                  | SCB               | SVM+perm          | T-test+NGB        |
|-------------|--------------------------|-------------------|-------------------|-------------------|
| <b>ACC</b>  | <b>0.952</b> $\pm$ 0.069 | 0.695 $\pm$ 0.154 | 0.731 $\pm$ 0.136 | 0.709 $\pm$ 0.170 |
| <b>Nsel</b> | 4251 $\pm$ 598           | 11085 $\pm$ 588   | 2433 $\pm$ 216    | 26757 $\pm$ 3397  |

581 of variable importance available at NeuroVault service (Gorgolewski et al.,  
582 2015) at <http://neurovault.org/collections/MOYIOPDI/>.

583 With the COBRE data, we studied the effect of multiple comparisons cor-  
584 rection to the classification accuracy and to the number of selected variables.  
585 For multiple comparisons correction, we used variable-wise false discovery  
586 rate (FDR) correction with Benjamini-Hochberg procedure (assuming inde-  
587 pendence) (Benjamini and Hochberg, 1995). The classification accuracies  
588 and the numbers of selected variables, with and without FDR correction, are  
589 shown in box-plots of Figure 6. SVM+perm was excluded from this experi-  
590 ment as the multiple comparisons problem is different with it (Gaonkar and  
591 Davatzikos, 2013) and it was found to produce an empty set of variables in  
592 some cases. As is shown in Figure 6, including multiple comparisons cor-  
593 rection had no influence to the classification performance with any of the  
594 methods.

#### 595 5.4. Computational complexity

596 The experiments were run in a computer Intel Xeon 2.40Ghz with 20  
597 cores and 128 Gb of RAM. The training of several SVMs that takes place in  
598 the bagging stages of both SCB and SCBconf is distributed in parallel across  
599 all the cores of the computer. Then, the weight aggregation that leads to the

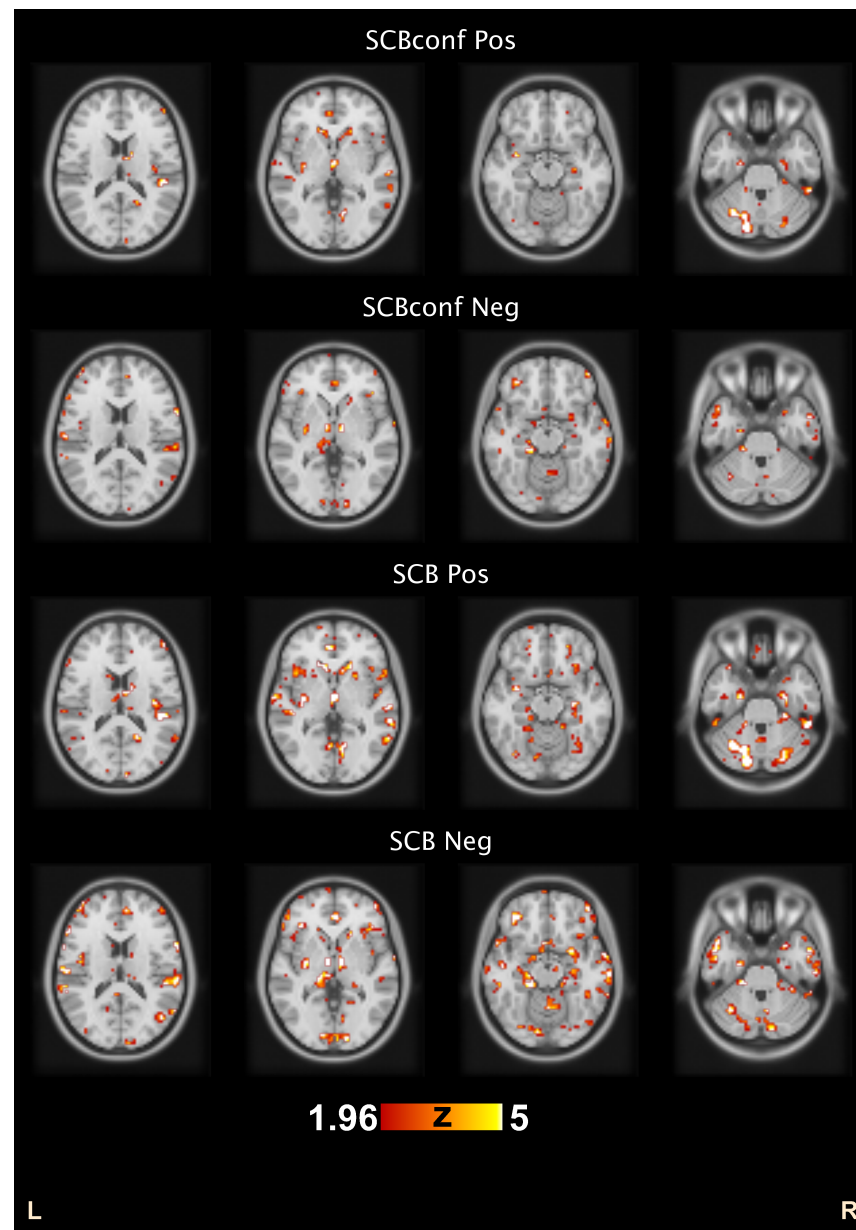

Figure 4: Median magnitudes of variable importance Z scores among 10 CV runs with COBRE data. The Z-scores are thresholded at  $|Z| > 1.96$ . Note that if a variable lights up then it was selected during at least half of the CV runs. 'Pos' and 'Neg' quantifiers refer to the strength of the positive and negative connectedness that were separated in the analysis. We do not visualize whether the classifier weights are negative or positive to avoid clutter. Axial slices at the z-coordinate of the MNI stereotactic space of 15mm, 0mm, -15mm, and -30mm are shown. Complete maps are available in the NeuroVault service <http://neurovault.org/collections/MOYIOPDI/>.



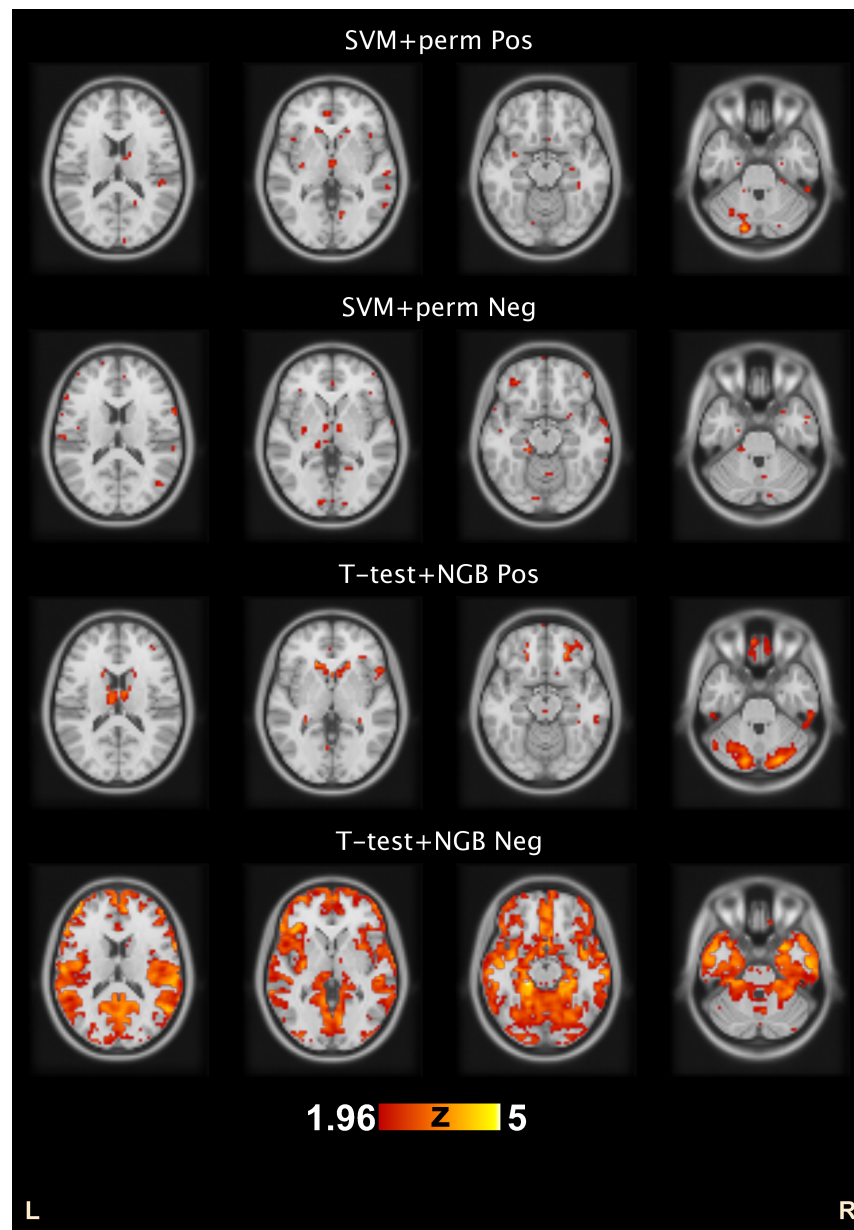

Figure 5: Median magnitudes of variable importance Z scores among 10 CV runs with COBRE data. The Z-scores are thresholded at  $|Z| > 1.96$ . Note that if a variable lights up then it was selected during at least half of the CV runs. 'Pos' and 'Neg' quantifiers refer to the strength of the positive and negative connectedness that were separated in the analysis. We do not visualize whether the classifier weights are negative or positive to avoid clutter. Axial slices at the z-coordinate of the MNI stereotactic space of 15mm, 0mm, -15mm, and -30mm are shown. Complete maps are available in the NeuroVault service <http://neurovault.org/collections/MOYIOPDI/>.

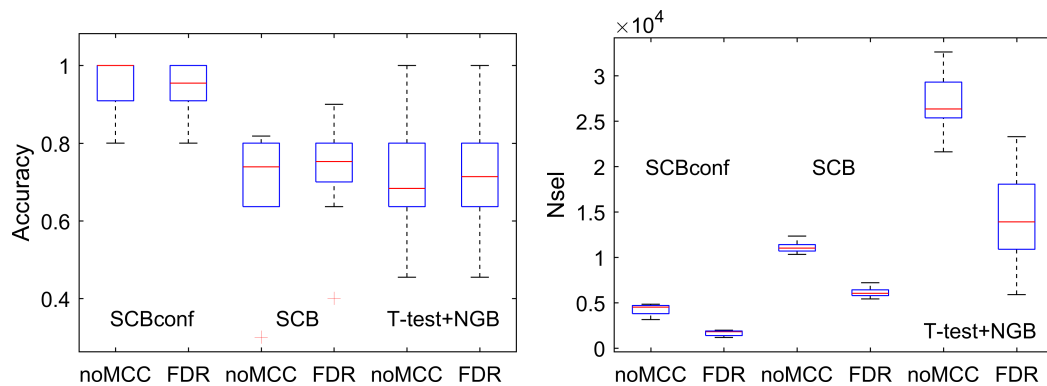

Figure 6: The classification accuracy and the number of selected variables across 10 CV folds with COBRE data with and without FDR based multiple comparisons correction. Whether FDR correction is included or not made no difference to the classification performance of the methods.

600 final measure of variable importance is computed using a single core, as well  
601 as the hypothesis testing and the evaluation of the final SVM used to assess  
602 the performance of these methods. The baseline methods, SVM+perm and  
603 t-test+ NGB, were run using a single core.

604 With respect to the computation time, the baseline methods SVM+perm  
605 and t-test+ NGB required between 1 and 5 seconds depending on the size  
606 of the dataset (number of samples and dimensionality) and on the number  
607 of selected important variables, as this last quantity determines the training  
608 time of the final classifier. However, the computational time of the SCB  
609 was in the range 5 to 6 minutes due to bagging. can be up to 2 hours  
610 in the case of the SCBconf, as each conformal analysis iteration involves a  
611 complete bagging and we carried out  $R = 20$  of these iterations. Obviously,  
612 since bagging can be easily run in parallel these times could be substantially  
613 reduced by further parallelization.

## 614 6. Discussion

615 In this paper, we have introduced and evaluated new variable importance  
616 measures based on sign consistency of classifier ensembles termed SCB and  
617 SCBconf. The measures are specially fitted in very high dimensional scenar-  
618 ios (with far more variables than samples) such as in neuroimaging, where  
619 many commonly used variable importance measures fail. The SCB variable  
620 importance measures extend and generalize ideas for the voxel selection we  
621 have introduced earlier in Parrado-Hernández et al. (2014). Additionally, we  
622 have derived a parametric hypothesis test that can be used to assign a p-value  
623 to the importance of the variable for a classification. We have shown that  
624 the variable selection using SCB importance measures leads to a more accu-  
625 rate classification than the variable selections based on a standard massively  
626 univariate hypothesis testing or a SVM-based parametric permutation test.  
627 These two were compared to the SCB methods because 1) they applicable to  
628 wide data and 2) come with a parametric hypothesis test to assign p-values  
629 to variable importance. We have also demonstrated that these new variable  
630 importance measures were robust and that they can lead to classification  
631 accuracies better than the state of art in schizophrenia classification based  
632 on resting state fMRI.

633 The basic idea behind the SCB methods is to train several thousand linear  
634 SVMs, each based on different subsample of data and then study the sign-  
635 consistency of weights assigned to each variable. The weights having the same  
636 sign is a strong indication of the stability of the interpretation of the variable  
637 with respect to random subsampling of the data and, thus, a strong indication  
638 of the importance of the variable. Therefore, we can quantify the importance

of the variable by studying the frequency of sign of the classifier weights assigned to it. While the ideas of random subsampling and random relabeling are widely used for variable importance and selection, for example, in the out-of-bag variable importances of Random Forests (Breiman, 2001), the idea of sign consistency is much less exploited and novel in brain imaging. SCBconf refines variable importance by utilizing test data by assigning the test data random labels. This is essentially relabeling in the transductive setting and it is especially useful in situations where the data is heterogeneous as we demonstrated using the COBRE resting-state fMRI sample.

Our approach in this work has been to use uncorrected p-values to threshold the variable importance scores. There are two reasons for this. First, the variable importance scores might be interesting also for variables that do not pass stringent multiple comparisons corrected threshold. Second, retaining also variables that are borderline important could improve the generalization performance of the classifier. With the COBRE fMRI dataset, we have shown that ultimately this is a matter of preference and whether using corrected or uncorrected thresholds makes no difference to the generalization performance of the classifier. We also experimented this with synthetic data and observed a slight drop in the classification performance when using the FDR corrected thresholds. As Gaonkar and Davatzikos (2013) noted, the classifier weights of an SVM are not independent and thus FDR based multiple comparisons correction probably over-corrects. In a data-rich situation, cross-validation based estimate of the generalization error might be used to select the optimal  $\alpha$ -threshold, however, one should keep in mind that cross-validation based error estimates have large variances (Dougherty et al., 2011) and this might

offset the potential gains of not setting the importance threshold a-priori (Tohka et al., 2016; Huttunen and Tohka, 2015; Varoquaux et al., 2017).

The SCB method essentially has two parameters: the number of resampling iterations  $S$  and the subsampling rate  $\gamma$ . In our target applications, where the number of variables is larger than the number of samples, the parameter  $C$  for the SVMs can always be selected to be large enough (here  $C = 100$ ) to ensure full separation. For the parameter  $S$ , the larger value is always better and we have found that  $S = 10.000$  has been sufficient. We have selected the subsampling rate to be 0.5 and previously we have found that the method is not sensitive to this parameter; in fact, these parameter settings agree with those previously used in Parrado-Hernández et al. (2014). SCBconf has one extra parameter  $R$  (the number of random labelings of the test samples). We have here selected  $R = 20$  and we do not expect gains by increasing this value.

# *Acknowledgments*

Data collection and sharing for this project was funded by the Alzheimer’s Disease Neuroimaging Initiative (ADNI) (National Institutes of Health Grant U01 AG024904) and DOD ADNI (Department of Defense award number W81XWH-12-2-0012). ADNI is funded by the National Institute on Aging, the National Institute of Biomedical Imaging and Bioengineering, and through generous contributions from the following: AbbVie, Alzheimers Association; Alzheimers Drug Discovery Foundation; Araclon Biotech; BioClinica, Inc.; Biogen; Bristol-Myers Squibb Company; CereSpir, Inc.; Eisai Inc.; Elan Pharmaceuticals, Inc.; Eli Lilly and Company; EuroImmun; F. Hoffmann-La Roche Ltd and its affiliated company Genentech, Inc.; Fujire-

bio; GE Healthcare; IXICO Ltd.; Janssen Alzheimer Immunotherapy Research & Development, LLC.; Johnson & Johnson Pharmaceutical Research & Development LLC.; Lumosity; Lundbeck; Merck & Co., Inc.; Meso Scale Diagnostics, LLC.; NeuroRx Research; Neurotrack Technologies; Novartis Pharmaceuticals Corporation; Pfizer Inc.; Piramal Imaging; Servier; Takeda Pharmaceutical Company; and Transition Therapeutics.

J. Tohka's work was supported by the Academy of Finland and V. Gómez-Verdejo's work has been partly funded by the Spanish MINECO grant TEC2014-52289R.

## 7. References

Archer, K.J., Kimes, R.V., 2008. Empirical characterization of random forest variable importance measures. *Computational Statistics & Data Analysis* 52, 2249–2260.

Bellec, P., Benhajali, Y., Carbonell, F., Dansereau, C., Albouy, G., Pelland, M., Craddock, C., Collignon, O., Doyon, J., Stip, E., Orban, P., 2015. Impact of the resolution of brain parcels on connectome-wide association studies in fmri. *NeuroImage* 123, 212 – 228.

Benjamini, Y., Hochberg, Y., 1995. Controlling the false discovery rate: a practical and powerful approach to multiple testing. *Journal of the royal statistical society. Series B (Methodological)* , 289–300.

Bi, J., Bennett, K., Embrechts, M., Breneman, C., Song, M., 2003. Dimensionality reduction via sparse support vector machines. *JMLR* 3, 1229–1243.

- 712 Bouckaert, R.R., Frank, E., 2004. Evaluating the replicability of significance  
713 tests for comparing learning algorithms, in: Advances in knowledge dis-  
714 covery and data mining. Springer, pp. 3–12.
- 715 Breiman, L., 2001. Random forests. Machine Learning 45, 5–32.
- 716 Caragea, D., Cook, D., Honavar, V.G., 2001. Gaining insights into support  
717 vector machine pattern classifiers using projection-based tour methods,  
718 in: Proceedings of the seventh ACM SIGKDD international conference on  
719 Knowledge discovery and data mining, ACM. pp. 251–256.
- 720 Chang, C.C., Lin, C.J., 2011. Libsvm: a library for support vector machines.  
721 ACM Transactions on Intelligent Systems and Technology (TIST) 2, 27.
- 722 Chu, C., Hsu, A.L., Chou, K.H., Bandettini, P., Lin, C., Initiative, A.D.N.,  
723 et al., 2012. Does feature selection improve classification accuracy? im-  
724 pact of sample size and feature selection on classification using anatomical  
725 magnetic resonance images. Neuroimage 60, 59–70.
- 726 Chyzhyk, D., Savio, A., Graña, M., 2015. Computer aided diagnosis of  
727 schizophrenia on resting state fmri data by ensembles of elm. Neural Net-  
728 works 68, 23–33.
- 729 Cohen, J.R., Asarnow, R.F., Sabb, F.W., Bilder, R.M., Bookheimer, S.Y.,  
730 Knowlton, B.J., Poldrack, R.A., 2010. Decoding developmental differences  
731 and individual variability in response inhibition through predictive analy-  
732 ses across individuals. The developing human brain , 136.
- 733 Collins, D.L., Evans, A.C., 1997. Animal: validation and applications of

734 nonlinear registration-based segmentation. *International journal of pattern*  
735 *recognition and artificial intelligence* 11, 1271–1294.

736 Dietterich, T.G., 1998. Approximate statistical tests for comparing super-  
737 vised classification learning algorithms. *Neural computation* 10, 1895–  
738 1923.

739 Dougherty, E., Zollanvari, A., Braga-Neto, U., 2011. The illusion of  
740 distribution-free small-sample classification in genomics. *Current genomics*  
741 12, 333–341.

742 Dubuisson, M.P., Jain, A.K., 1994. A modified hausdorff distance for object  
743 matching, in: *Pattern Recognition, 1994. Vol. 1-Conference A: Computer*  
744 *Vision & Image Processing., Proceedings of the 12th IAPR Interna-*  
745 *tional Conference on, IEEE.* pp. 566–568.

746 Dukart, J., Schroeter, M.L., Mueller, K., Initiative, A.D.N., et al., 2011. Age  
747 correction in dementia—matching to a healthy brain. *PloS one* 6, e22193.

748 Fonov, V., Evans, A.C., Botteron, K., Almli, C.R., McKinstry, R.C., Collins,  
749 D.L., Group, B.D.C., et al., 2011. Unbiased average age-appropriate atlases  
750 for pediatric studies. *NeuroImage* 54, 313–327.

751 Friedman, J., Hastie, T., Tibshirani, R., 2008. *The elements of statistical*  
752 *learning* 2nd Ed.. volume 1. Springer series in statistics Springer, Berlin.

753 Gammerman, A., Vovk, V., Vapnik, V., 1998. Learning by transduction, in:  
754 *AISTATS98, Morgan Kaufmann Publishers Inc..* pp. 148–155.



755 Gaonkar, B., Davatzikos, C., 2013. Analytic estimation of statistical signifi-  
756 cance maps for support vector machine based multi-variate image analysis  
757 and classification. *NeuroImage* 78, 270–283.

758 Gaser, C., Franke, K., Klöppel, S., Koutsouleris, N., Sauer, H., Initiative,  
759 A.D.N., et al., 2013. BrainAGE in mild cognitive impaired patients: pre-  
760 dicting the conversion to alzheimers disease. *PloS ONE* 8, e67346.

761 Giove, F., Gili, T., Iacovella, V., Macaluso, E., Maraviglia, B., 2009. Images-  
762 based suppression of unwanted global signals in resting-state functional  
763 connectivity studies. *Magnetic resonance imaging* 27, 1058–1064.

764 Gomez-Verdejo, V., Parrado-Hernandez, E., Tohka, J., 2016. Voxel impor-  
765 tance in classifier ensembles based on sign consistency patterns: appli-  
766 cation to smri, in: *Pattern Recognition in Neuroimaging (PRNI)*, 2016  
767 International Workshop on, IEEE. pp. 1–4.

768 Gorgolewski, K.J., Varoquaux, G., Rivera, G., Schwarz, Y., Ghosh, S.S.,  
769 Maumet, C., Sochat, V.V., Nichols, T.E., Poldrack, R.A., Poline, J.B.,  
770 et al., 2015. Neurovault. org: a web-based repository for collecting and  
771 sharing unthresholded statistical maps of the human brain. *Frontiers in*  
772 *neuroinformatics* 9, 8.

773 Greenstein, D., Malley, J.D., Weisinger, B., Clasen, L., Gogtay, N., 2012.  
774 Using multivariate machine learning methods and structural mri to classify  
775 childhood onset schizophrenia and healthy controls. *Front Psychiatry* 3,  
776 53.

777 Grosenick, L., Klingenberg, B., Katovich, K., Knutson, B., Taylor, J.E., 2013.  
778 Interpretable whole-brain prediction analysis with graphnet. *NeuroImage*  
779 72, 304–321.

780 Guo, W., Liu, F., Xiao, C., Liu, J., Yu, M., Zhang, Z., Zhang, J., Zhao, J.,  
781 2015. Increased short-range and long-range functional connectivity in first-  
782 episode, medication-naïve schizophrenia at rest. *Schizophrenia Research*  
783 166, 144 – 150.

784 Guyon, I., Weston, J., Barnhill, S., Vapnik, V., 2002. Gene selection for  
785 cancer classification using support vector machines. *Machine Learning* 46,  
786 389–422.

787 Haufe, S., Meinecke, F., Görgen, K., Dähne, S., Haynes, J.D., Blankertz,  
788 B., Bießmann, F., 2014. On the interpretation of weight vectors of linear  
789 models in multivariate neuroimaging. *Neuroimage* 87, 96–110.

790 Huttunen, H., Tohka, J., 2015. Model selection for linear classifiers using  
791 bayesian error estimation. *Pattern Recognition* 48, 3739–3748.

792 John, G.H., Langley, P., 1995. Estimating continuous distributions in  
793 bayesian classifiers, in: *Proceedings of the Eleventh conference on Un-*  
794 *certainty in artificial intelligence*, Morgan Kaufmann Publishers Inc.. pp.  
795 338–345.

796 Kerr, W.T., Douglas, P.K., Anderson, A., Cohen, M.S., 2014. The utility  
797 of data-driven feature selection: Re: Chu et al. 2012. *NeuroImage* 84,  
798 1107–1110.

799 Khundrakpam, B.S., Tohka, J., Evans, A.C., 2015. Prediction of brain matu-  
800 rity based on cortical thickness at different spatial resolutions. *NeuroImage*  
801 111, 350–359.

802 Kim, J., Calhoun, V.D., Shim, E., Lee, J.H., 2016. Deep neural network with  
803 weight sparsity control and pre-training extracts hierarchical features and  
804 enhances classification performance: Evidence from whole-brain resting-  
805 state functional connectivity patterns of schizophrenia. *NeuroImage* 124,  
806 127–146.

807 Langs, G., Menze, B.H., Lashkari, D., Golland, P., 2011. Detecting stable  
808 distributed patterns of brain activation using gini contrast. *NeuroImage*  
809 56, 497–507.

810 Michel, V., Gramfort, A., Varoquaux, G., Eger, E., Thirion, B., 2011. To-  
811 tal variation regularization for fmri-based prediction of behavior. *IEEE*  
812 *transactions on medical imaging* 30, 1328–1340.

813 Moradi, E., Pepe, A., Gaser, C., Huttunen, H., Tohka, J., 2015. Machine  
814 learning framework for early mri-based alzheimer’s conversion prediction  
815 in mci subjects. *Neuroimage* 104, 398–412.

816 Mouro-Miranda, J., Bokde, A., Born, C., Hampel, H., Stetter, M., 2005.  
817 Classifying brain states and determining the discriminating activation pat-  
818 terns: Support vector machine on functional mri data. *NeuroImage* 28,  
819 980995.

820 Mwangi, B., Tian, T.S., Soares, J.C., 2014. A review of feature reduction  
821 techniques in neuroimaging. *Neuroinformatics* 12, 229–244.

822 Nadeau, C., Bengio, Y., 2003. Inference for the generalization error. *Machine*  
823 *Learning* 52, 239–281.

824 Parrado-Hernández, E., Gómez-Verdejo, V., Martínez-Ramón, M., Shawe-  
825 Taylor, J., Alonso, P., Pujol, J., Menchón, J.M., Cardoner, N., Soriano-  
826 Mas, C., 2014. Discovering brain regions relevant to obsessive-compulsive  
827 disorder identification through bagging and transduction. *Medical image*  
828 *analysis* 18, 435–448.

829 Pedregosa, F., Varoquaux, G., Gramfort, A., Michel, V., Thirion, B., Grisel,  
830 O., Blondel, M., Prettenhofer, P., Weiss, R., Dubourg, V., et al., 2011.  
831 Scikit-learn: Machine learning in python. *Journal of Machine Learning*  
832 *Research* 12, 2825–2830.

833 Power, J.D., Barnes, K.A., Snyder, A.Z., Schlaggar, B.L., Petersen, S.E.,  
834 2012. Spurious but systematic correlations in functional connectivity mri  
835 networks arise from subject motion. *Neuroimage* 59, 2142–2154.

836 Seaton, B.E., Goldstein, G., Allen, D.N., 2001. Sources of heterogeneity in  
837 schizophrenia: the role of neuropsychological functioning. *Neuropsychol-*  
838 *ogy review* 11, 45–67.

839 Tohka, J., Moradi, E., Huttunen, H., 2016. Comparison of feature selec-  
840 tion techniques in machine learning for anatomical brain mri in dementia.  
841 *Neuroinformatics* , in press.

842 Tzourio-Mazoyer, N., Landeau, B., Papathanassiou, D., Crivello, F., Etard,  
843 O., Delcroix, N., Mazoyer, B., Joliot, M., 2002. Automated anatomical

844 labeling of activations in spm using a macroscopic anatomical parcellation  
845 of the mni mri single-subject brain. *Neuroimage* 15, 273–289.

846 Varoquaux, G., Raamana, P.R., Engemann, D.A., Hoyos-Idrobo, A.,  
847 Schwartz, Y., Thirion, B., 2017. Assessing and tuning brain decoders:  
848 cross-validation, caveats, and guidelines. *NeuroImage* 145, 166–179.

849 Wang, X., Xia, M., Lai, Y., Dai, Z., Cao, Q., Cheng, Z., Han, X., Yang, L.,  
850 Yuan, Y., Zhang, Y., Li, K., Ma, H., Shi, C., Hong, N., Szeszko, P., Yu, X.,  
851 He, Y., 2014. Disrupted resting-state functional connectivity in minimally  
852 treated chronic schizophrenia. *Schizophrenia Research* 156, 150 – 156.

853 Wang, Z., Childress, A., Wang, J., Detre, J., 2007. Support vector machine  
854 learning-based fmri data group analysis. *NeuroImage* 36, 1139–1151.

855 Zou, H., Hastie, T., 2005. Regularization and variable selection via the elastic  
856 net. *J. R. Stat. Soc.: Series B* 67, 301–320.
